# Supplementary material
Source: PubMed Central journal article supplement (PMC3038491)
Supplement: jc.2010-1655_1.pdf [file jc.2010-1655_1.pdf]

## Supplemental data information

**Supplemental Table 1.** Fifty patients involved in the *PDE11A* study.

**Supplemental Table 2.** Primers used to generate mutant expression vectors of *PDE11A*.

Legend: All the forward and reverse primers are complementary to each other and contain the mutant base (**bold**) mismatched to the wild type in the middle of the sequence.

**Supplemental table 3.** *In silico* modeling of the effect of *PDE11A* missense substitution on the protein function.

Legend: \* greater score indicates higher probability to impair the protein function; the factors taken into account for the calculation of the score are:

- (1) difference in the thermo-physical properties of the wt and mutant protein, and
- (2) evolutionary preservation of the residue in the corresponding position.

**Supplemental Table 4:** Allele frequency distribution of sequence variations in *PDE11A* in PCa patients compared to patients with testicular germ cell tumors (TGCT) and adrenocortical tumors (ADT).

Legend:\* Newly identified in the PCa patients only variations.

NA=Not Applicable.

$\chi^2$  is calculated after Yates correction for continuity (Yates correction was applied for all calculations having number<10 in any cell of the contingency table).

**Supplemental Table 1.** Fifty patients involved in the *PDE11A* study.

| Sample | Age | Familiar History | Gleason Score | previous PSA | last PSA | Staging |
|--------|-----|------------------|---------------|--------------|----------|---------|
| 1 DT   | 64  | 0                | 6             | 7.89         | 0.040    | pT2b    |
| 2 DT   | 56  | 0                | 6             | 8.30         | 0.020    | pT3a    |
| 3 DT   | 61  | 0                | 8             | 9.20         | 0.079    | pT2b    |
| 4 DT   | 61  | 0                | 8             | 5.00         | 0.010    | pT3a    |
| 5 DT   | 67  | 0                | 6             | 9.50         | 0.100    | pT2b    |
| 6 DT   | 66  | 0                | 6             | 13.80        | 0.007    | -       |
| 7 DT   | 56  | 0                | 6             | 10.60        | 0.050    | pT3a    |
| 8 DT   | 61  | 0                | 6             | 4.20         | 0.169    | pT3b    |
| 9 DT   | 64  | 0                | 6             | 5.70         | 0.050    | pT3b    |
| 10 DT  | 78  | -                | 6             | -            | -        | pT2a    |
| 11 DT  | 71  | 0                | 6             | 8.95         | 0.010    | pT3a    |
| 12 DT  | 56  | 0                | 7             | 21.90        | 0.300    | pT2b    |
| 13 DT  | 50  | 1                | 7             | 18.16        | 3.500    | pT2b    |
| 14 DT  | 57  | 0                | 7             | 4.60         | 0.030    | pT2b    |
| 15 DT  | 72  | 0                | 7             | 7.32         | 0.040    | pT4a    |
| 16 DT  | 64  | 0                | 7             | 25.90        | 0.010    | pT3a    |
| 17 DT  | 77  | 0                | 7             | 7.20         | 0.110    | pT2b    |
| 18 DT  | 58  | 1                | 7             | 2.40         | 0.075    | pT2b    |
| 19 DT  | 69  | 0                | 7             | 20.30        | 0.010    | pT2b    |
| 20 DT  | 55  | 0                | 7             | 14.00        | 0.918    | pT2b    |
| 21 DT  | 48  | 0                | 7             | 7.60         | 0.050    | pT2a    |
| 22 DT  | 62  | 0                | 7             | 5.74         | 0.050    | pT3a    |
| 23 DT  | 58  | 1                | 7             | 8.60         | 0.062    | pT3a    |
| 24 DT  | 61  | 0                | 7             | 17.80        | 0.030    | pT3a    |
| 25 DT  | 54  | 0                | 7             | 7.30         | 0.050    | pT3a    |
| 26 DT  | 60  | 0                | 7             | 4.22         | 0.010    | pT3a    |
| 27 DT  | 64  | 1                | 7             | 7.50         | 0.008    | pT3a    |
| 28 DT  | 71  | 0                | 7             | 7.10         | 0.179    | pT3a    |
| 29 DT  | 65  | 0                | 7             | 16.50        | 0.080    | pT3a    |
| 30 DT  | 62  | 0                | 7             | 5.11         | 0.040    | pT2a    |
| 31 DT  | 55  | 0                | 7             | 22.10        | 0.003    | pT2b    |
| 32 DT  | 72  | 0                | 7             | 6.80         | 0.053    | pT3a    |
| 33 DT  | 60  | 0                | 7             | 5.20         | 0.019    | pT3b    |
| 34 DT  | 61  | 0                | 7             | 5.70         | 0.020    | pT3a    |
| 35 DT  | 79  | 0                | 7             | 8.63         | 0.100    | pT2b    |
| 36 DT  | 62  | 0                | 7             | 20.28        | 0.320    | pT2b    |
| 37 DT  | 73  | 2                | 7             | 21.87        | 0.040    | pT3a    |
| 38 DT  | 60  | 0                | 7             | 32.05        | 0.310    | pT2b    |
| 39 DT  | 68  | 0                | 7             | 6.21         | 0.060    | pT3a    |
| 40 DT  | -   | 0                | 7             | -            | -        | pT4a    |
| 41 DT  | 74  | 0                | 7             | 5.25         | 0.020    | pT3a    |
| 42 DT  | 65  | 0                | 7             | 13.94        | 0.586    | pT2b    |
| 43 DT  | 64  | 0                | 7             | 9.20         | 0.090    | pT2b    |
| 44 DT  | 56  | 0                | 7             | 9.60         | 0.085    | pT3b    |
| 45 DT  | 70  | 0                | 7             | 10.30        | 0.008    | pT2a    |
| 46 DT  | 66  | 0                | 7             | 33.61        | 0.170    | pT3a    |
| 47 DT  | 63  | 0                | 7             | 3.93         | 0.010    | -       |
| 48 DT  | 67  | 0                | 7             | 23.30        | 0.070    | -       |
| 49 DT  | 74  | 0                | 7             | 6.30         | 0.003    | -       |
| 50 DT  | 63  | 0                | 7             | 7.60         | 0.003    | -       |

**Supplemental Table 2.** Primers used to generate mutant expression vectors of *PDE11A*.

| <b><i>PDE11A</i> missense variation</b> | <b>Forward primer (5' – 3')</b> | <b>Reverse primer (5' – 3')</b> |
|-----------------------------------------|---------------------------------|---------------------------------|
| c.604C>T / p.R202C                      | TGAGTGTTCAGTTCTTTCTGGAATTG      | CAATTCCAGAAAGAACTGACACTCA       |
| c.1973A>G / p.Y658C                     | CTGTCGGATGGTTCTATACCACAA        | TTGTGGTATAGAACCATCCGACAG        |
| c.2518G>A / p.E840K                     | CAGTGAGTTCTTCAAACAAGGAGAT       | ATCTCCTTGTTTGAAGAACTCACTG       |

**Supplemental Table 3.** *In silico* modeling of the effect of *PDE11A* missense substitution on the protein function.

| DNA change | Protein change | Domain           | In silico modeling |        |
|------------|----------------|------------------|--------------------|--------|
|            |                |                  | Prediction         | Score* |
| c.607C>T   | p.R202C        | cAMP binding A   | Likely benign      | 0.021  |
| c.1973A>G  | p.Y658C        | Catalytic Domain | Probably damaging  | 2.846  |
| c.2518G>A  | p.E840K        | Catalytic Domain | Likely benign      | 1.309  |

**Supplemental Table 4:** Allele frequency distribution of sequence variations in *PDE11A* in PCa patients compared to patients with testicular germ cell tumors (TGCT) and adrenocortical tumors (ADT).

| Sequence change           | Mutation type             | PCa patients (100 alleles) | TGCT patients (128 alleles) | ADT patients (234 alleles) | PCa vs TGCT |             | PCa vs ADT  |             |
|---------------------------|---------------------------|----------------------------|-----------------------------|----------------------------|-------------|-------------|-------------|-------------|
|                           |                           |                            |                             |                            | $\chi^2$    | P           | $\chi^2$    | P           |
| p.R52T                    | missense                  | 0 (0.00)                   | 1 (0.008)                   | 0 (0.000)                  | 0.02        | 0.89        | 0.09        | 0.76        |
| c.171Tdel<br>FS41X        | frame-shift<br>stop-codon | 1 (0.01)                   | 0 (0.000)                   | 0 (0.000)                  | 0.02        | 0.89        | NA          | NA          |
| p.R202C*                  | missense                  | 1 (0.01)                   | 0 (0.000)                   | 0 (0.000)                  | 0.02        | 0.89        | NA          | NA          |
| p.F205L                   | missense                  | 0 (0.00)                   | 0 (0.000)                   | 1 (0.004)                  | NA          | NA          | 0.09        | 0.76        |
| p.F258Y                   | missense                  | 0 (0.00)                   | 1 (0.008)                   | 0 (0.000)                  | 0.02        | 0.89        | 0.09        | 0.76        |
| p.G291R                   | missense                  | 0 (0.00)                   | 1 (0.008)                   | 0 (0.000)                  | 0.02        | 0.89        | 0.09        | 0.76        |
| p.R307X                   | nonsense                  | 0 (0.00)                   | 1 (0.008)                   | 1 (0.004)                  | 0.02        | 0.89        | 0.09        | 0.76        |
| p.A349T                   | missense                  | 0 (0.00)                   | 0 (0.000)                   | 2 (0.009)                  | NA          | NA          | 0.09        | 0.76        |
| c.1655_1657indel<br>FS15X | frame-shift<br>stop-codon | 0 (0.00)                   | 0 (0.000)                   | 0 (0.000)                  | NA          | NA          | NA          | NA          |
| p.D609N                   | missense                  | 0 (0.00)                   | 0 (0.000)                   | 1 (0.004)                  | NA          | NA          | 0.09        | 0.76        |
| p.Y658C*                  | missense                  | 1 (0.01)                   | 0 (0.000)                   | 0 (0.000)                  | 0.02        | 0.89        | NA          | NA          |
| p.H664G                   | missense                  | 0 (0.00)                   | 0 (0.000)                   | 1 (0.004)                  | NA          | NA          | 0.09        | 0.76        |
| p.Y727C                   | missense                  | 5 (0.05)                   | 3 (0.023)                   | 4 (0.017)                  | 0.52        | 0.47        | 0.00        | 1           |
| p.R804H                   | missense                  | 3 (0.03)                   | 3 (0.023)                   | 8 (0.034)                  | 0.02        | 0.89        | 0.06        | 0.81        |
| p.V820M                   | missense                  | 0 (0.00)                   | 1 (0.008)                   | 0 (0.000)                  | 0.02        | 0.89        | 0.09        | 0.76        |
| p.E840K*                  | missense                  | 2 (0.02)                   | 0 (0.000)                   | 0 (0.000)                  | 0.79        | 0.37        | NA          | NA          |
| p.R867G                   | missense                  | 1 (0.01)                   | 3 (0.023)                   | 5 (0.021)                  | 0.07        | 0.79        | 0.06        |             |
| p.M878V                   | missense                  | 2 (0.02)                   | 2 (0.016)                   | 1 (0.004)                  | 0.07        | 0.79        | 0.09        | 0.76        |
| <b>Total</b>              |                           | <b>16 (0.160)</b>          | <b>16 (0.125)</b>           | <b>24 (0.103)</b>          | <b>0.57</b> | <b>0.45</b> | <b>2.19</b> | <b>0.14</b> |
